# Supplementary material for: Circulating Sex Hormone Levels and Colon Cancer Risk in Men: A Nested Case–Control Study and Meta-Analysis
Source: Oxford University Press journal article supplement (doi:10.1158/1055-9965.epi-21-0996), 2022-01-27
Supplement: epi-21-0996_table_s3_supps3.docx [file epi-21-0996_table_s3_supps3.docx]

| **Table S3.** Associations of circulating levels of sex hormones and SHBG (quartiles) with colon cancer in EPIC and NSHDS, excluding cases and corresponding controls with less than two years until diagnosis. | | | | | | |
| --- | --- | --- | --- | --- | --- | --- |
|  | **Quartile 1** | **Quartile 2** | **Quartile 3** | **Quartile 4** | **Ptrend** | **Continuousc** |
| **Androstenedione**  Quartile cutpoints, pg/mL  N (case/control)  Multivariable-adjusted OR (95% CI)a | ≤ 544.9  180/166  1.00 | > 544.9 - 717.9  157/165  0.84 (0.61-1.16) | > 717.9 - 922.7  145/165  0.80 (0.57-1.13) | > 922.7  180/166  1.06 (0.74-1.53) | 0.83 | 1.07 (0.85-1.36) |
| **Dehydroepiandrosterone**  Quartile cutpoints, ng/mL  N (case/control)  Multivariable-adjusted OR (95% CI)a | ≤ 1.50  174/166  1.00 | > 1.50 - 2.34  167/165  0.92 (0.67-1.27) | > 2.34 - 3.47  145/165  0.87 (0.62-1.24) | > 3.47  176/166  1.17 (0.81-1.69) | 0.54 | 1.06 (0.91-1.24) |
| **Estrone**  Quartile cutpoints, pg/mL  N (case/control)  Multivariable-adjusted OR (95% CI)a | ≤ 22.4  160/165  1.00 | > 22.4 - 28.0  143/165  0.90 (0.65-1.26) | > 28.0 - 35.8  175/164  1.09 (0.78-1.51) | > 35.8  184/165  1.13 (0.79-1.63) | 0.33 | 1.14 (0.87-1.49) |
| **Estradiol**  Quartile cutpoints, pg/mL  N (case/control)  Multivariable-adjusted OR (95% CI)a | ≤ 14.8  151/166  1.00 | > 14.8 - 19.1  188/165  1.26 (0.91-1.74) | > 19.1 - 24.1  161/165  1.02 (0.73-1.42) | > 24.1  161/166  0.95 (0.65-1.38) | 0.62 | 0.77 (0.58-1.02) |
| **Progesterone**  Quartile cutpoints, pg/mL  N (case/control)  Multivariable-adjusted OR (95% CI)a | ≤ 56.4  186/166  1.00 | > 56.4 - 78.4  170/165  0.95 (0.70-1.29) | > 78.4 - 112.0  152/165  0.93 (0.66-1.30) | > 112.0  154/166  0.93 (0.66-1.32) | 0.69 | 1.07 (0.89-1.29) |
| **Testosterone**  Quartile cutpoints, ng/mL  N (case/control)  Multivariable-adjusted OR (95% CI)a | ≤ 3.47  199/166  1.00 | > 3.47 - 4.40  183/165  0.95 (0.70-1.28) | > 4.40 - 5.49  137/165  0.75 (0.53-1.05) | > 5.49  143/166  0.79 (0.55-1.14) | 0.13 | 0.69 (0.52-0.92) |
| **Free estradiol**  Quartile cutpoints, pg/mL  N (case/control)  Multivariable-adjusted OR (95% CI)a | ≤ 0.38  140/166  1.00 | > 0.38 - 0.48  168/165  1.19 (0.85-1.67) | > 0.48 - 0.62  205/165  1.41 (1.01-1.98) | > 0.62  148/166  0.88 (0.61-1.28) | 0.71 | 0.94 (0.70-1.25) |
| **Free Testosterone**  Quartile cutpoints, pg/mL  N (case/control)  Multivariable-adjusted OR (95% CI)a | ≤ 65.2  191/166  1.00 | > 65.2 - 77.7  163/165  0.82 (0.59-1.13) | > 77.7 - 93.0  160/165  0.85 (0.60-1.19) | > 93.0  148/166  0.78 (0.54-1.13) | 0.23 | 0.84 (0.59-1.20) |
| **SHBG**  Quartile cutpoints, pg/mL  N (case/control)  Multivariable-adjusted OR (95% CI)a  Multivariable-adjusted OR (95% CI)b | ≤ 28.4  212/166  1.00  1.00 | > 28.4 - 37.4  149/165  0.73 (0.53-1.00)  0.76 (0.55-1.06) | > 37.4 - 50.8  163/165  0.84 (0.60-1.18)  0.90 (0.62-1.30) | > 50.8  138/166  0.69 (0.47-1.00)  0.79 (0.50-1.26) | 0.08  0.55 | 0.79 (0.63-0.98)  0.84 (0.61-1.16) |

Abbreviations: Number of (n), Odds Ratio (OR), Confidence Interval (CI).

aAdjusted for BMI (continuous), smoking status (current, former, never, unknown), physical activity (active, moderately active, moderately inactive, inactive), alcohol consumption (zero, below median, above median).

bAdditionally adjusted for levels of estradiol and testosterone.

cOR per 1-log2 unit increment
